# Supplementary material for: Proteostasis by STUB1/HSP70 complex controls sensitivity to androgen receptor targeted therapy in advanced prostate cancer
Source: PubMed Central journal article supplement (PMC6240084; doi:10.1038/s41467-018-07178-x), 2018-11-16
Supplement: 41467_2018_7178_MOESM1_ESM.pdf [file 41467_2018_7178_MOESM1_ESM.pdf]

## Supplementary Information

Proteostasis by STUB1/HSP70 complex controls sensitivity to androgen receptor targeted therapy in advanced prostate cancer

Liu, et al.

Supplementary Figure 1

a

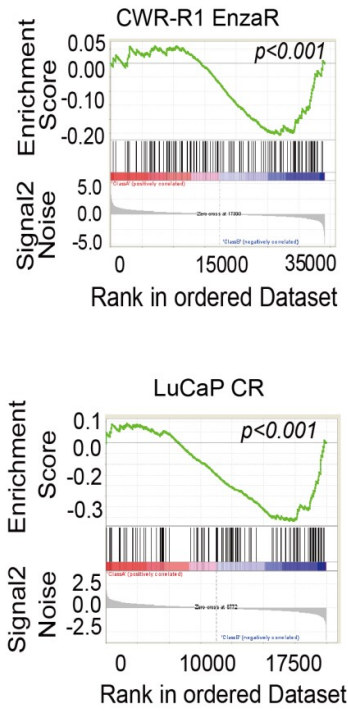

b

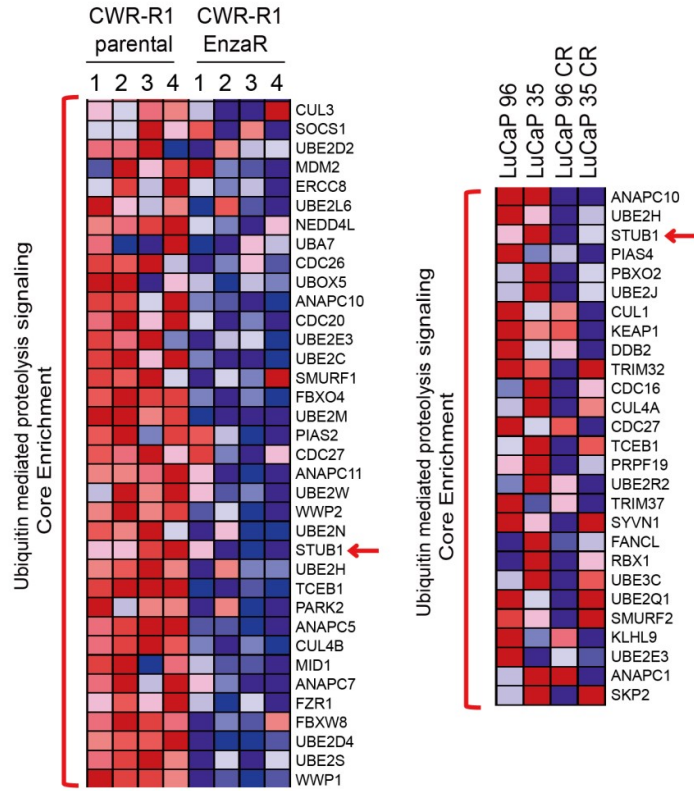

c

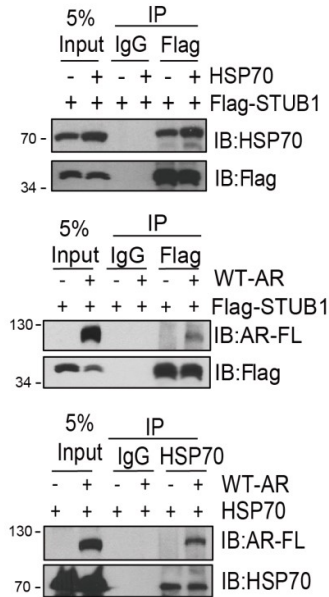

d

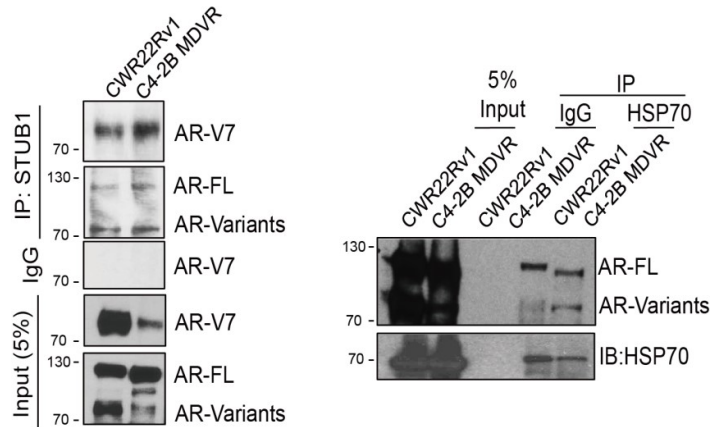

**Supplementary Figure 1. The UPS is altered in enzalutamide resistant prostate cancer.**

**(a)** Global gene microarray data from CWR-R1 parental and CWR-R1 EnzaR cells, LuCaP and LuCaP CR tumors were analyzed by GSEA, ubiquitin mediated proteolysis gene set was enriched in resistant cells and LuCaP CR models. **(b)** Core-enrichment genes of ubiquitin mediated proteolysis pathway in CWR-R1 EnzaR cells and LuCaP CR tumors. The red arrow showed STUB1 was suppressed in resistant cells and LuCaP CR tumors. **(c)** 293 cells were transiently transfected with Flag-STUB1 or HSP70 with or without WT-AR for 3 days and whole cell lysates were immunoprecipitated with anti-Flag or HSP70 antibodies and blotted with AR, Flag or HSP70 antibodies. **(d)** Whole cell lysates from C4-2B MDVR and CWR22Rv1 cells were extracted and immunoprecipitated with anti-STUB1 (left) or HSP70 (right) antibodies and blotted with AR-V7 and AR antibodies.

# Supplementary Figure 2

a

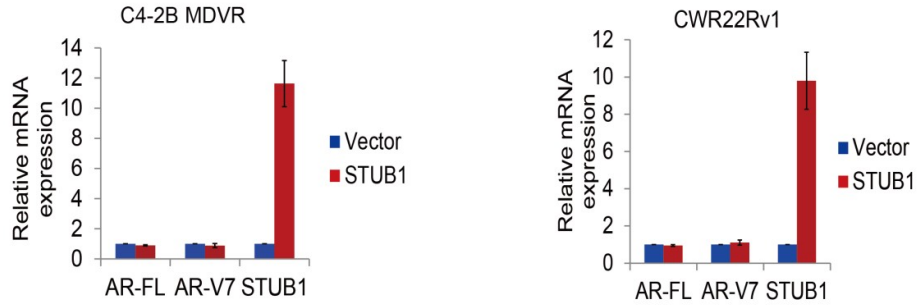

b

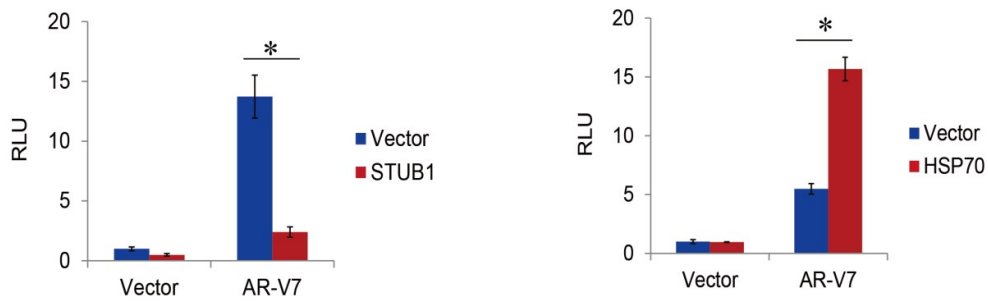

c

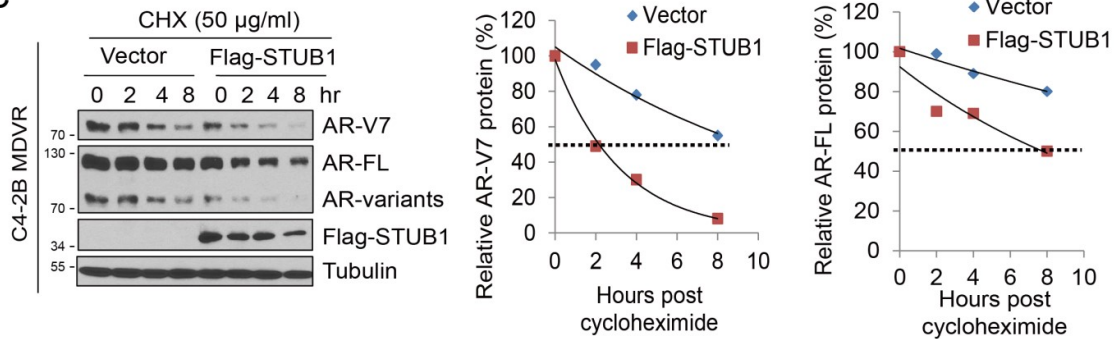

d

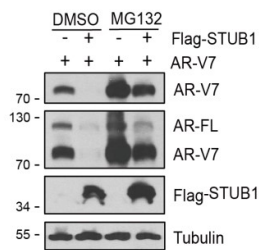

e

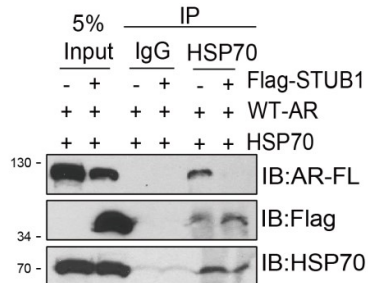

f

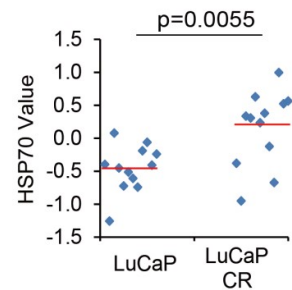

**Supplementary Figure 2. STUB1 regulates AR-V7 expression and activity.** (a) CWR22Rv1 and C4-2B MDVR cells were transiently transfected with 2  $\mu$ g or 5  $\mu$ g Flag-STUB1 for 3 days, total RNA was extracted and mRNA expression of AR-FL, AR-V7 and STUB1 was determined by qRT-PCR. (b) C4-2B cells were transiently transfected with vector plasmid, AR-V7 and PSA-luciferase plasmid with or without STUB1 (left) or HSP70 (right) plasmid, the PSA luciferase activity was determined 3 days after transfection. (c) C4-2B MDVR cells were transiently transfected with vector or flag-STUB1 and then treated with 50  $\mu$ g per mL cycloheximide (CHX), total cell lysates were collected at 0, 2, 4 and 8 hours after the treatment and subjected to western blot and the half-life of AR-V7 and AR-FL were calculated. (d) C4-2B cells were transiently transfected with AR-V7 with or without STUB1 for 3 days and then treated with 5  $\mu$ M MG132 overnight. Total cell lysates were collected and subjected to western blot. (e) 293 cells were co-transfected with HSP70, AR-FL with or without Flag-STUB1 for 3 days, whole cell lysates were immunoprecipitated with anti-HSP70 antibody and blotted with AR, HSP70 and Flag antibodies. (f) Gene expression data was extracted from GSE93812 data set and HSP70 expression was determined in LuCaP parental and LuCaP CR PDX tumor samples. \*  $p < 0.05$ . Results are the mean of three independent experiments ( $\pm$ S.D.). Statistical analysis was performed using two tailed Student's t test.

Supplementary Figure 3

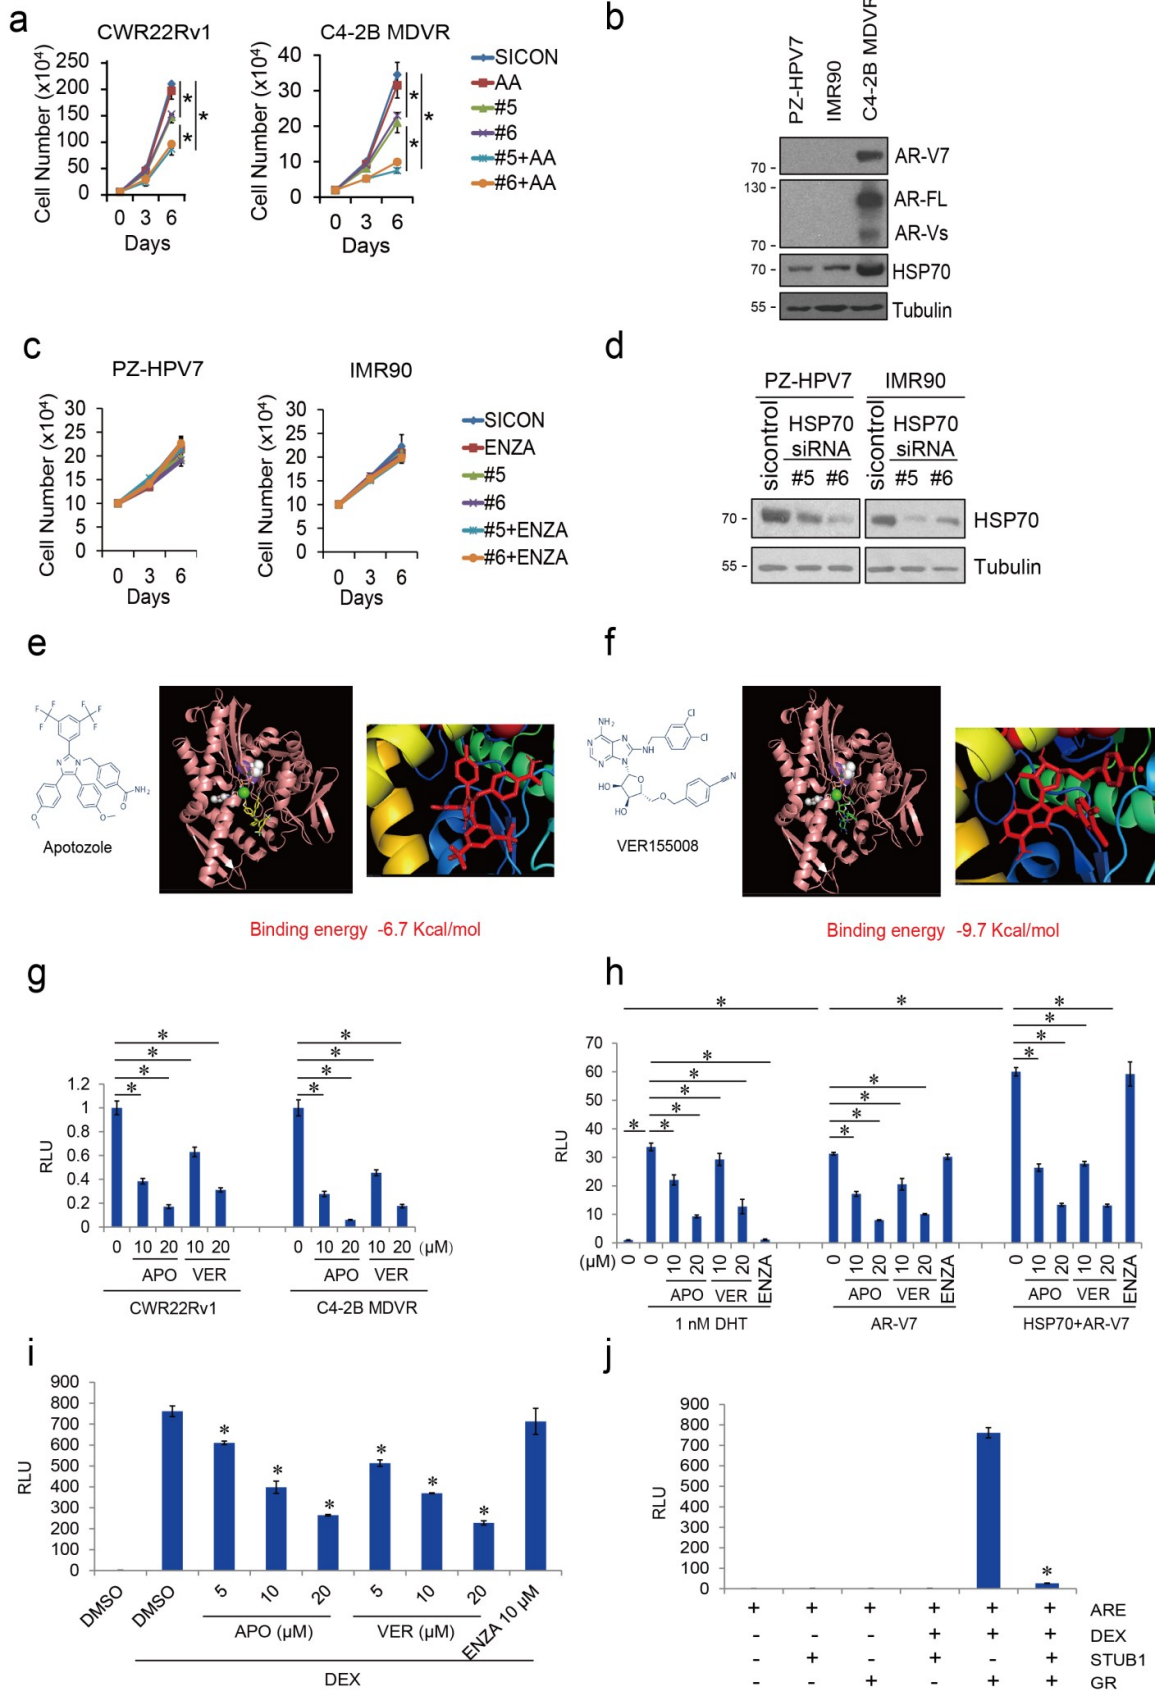

**Supplementary Figure 3. HSP70 inhibition suppresses AR-V7 transcriptional activity and prostate cancer cell growth.** (a) CWR22Rv1 and C4-2B MDVR cells were transiently transfected with two independent HSP70 siRNA (#5 and #6) and then treated with 5  $\mu$ M abiraterone. Total cell numbers was determined at 3 and 6 days. (b) Whole cell lysates from PZ-HPV7, IMR90 and C4-2B MDVR cells were extracted and subjected to western blot. (c-d) PZ-HPV7 and IMR90 cells were transiently transfected with two independent HSP70 siRNA (#5 and #6) and then treated with 20  $\mu$ M enzalutamide. Total cell number was determined at 3 and 6 days. Whole cell lysates were collected and subjected to western blot. (e) Structure of APO (left). Docking model of APO and HSP70 ATPase pocket, the lowest binding energy was -6.7 Kcal per mol (right) through AutoDock vina and PyMOL. (f) Structure of VER (left). Docking model of VER and HSP70 ATPase binding pocket, the lowest binding energy was -9.7 Kcal per mol (right) through AutoDock vina and PyMOL. (g) CWR22Rv1 and C4-2B MDVR cells were transiently transfected with PSA luciferase plasmid and then treated with different concentrations of APO or VER overnight, the PSA luciferase activity was determined. (h) C4-2B cells were transiently transfected with vector, AR-V7 or HSP70 plus AR-V7, treated with 1 nM DHT or control and then treated with different concentrations of HSP70 inhibitors or 20  $\mu$ M enzalutamide overnight. PSA luciferase activity was determined. (i) 293 cells were transiently transfected with vector or GR, treated with 10 nM DEX or DMSO and then treated with different concentrations of HSP70 inhibitors or 10  $\mu$ M enzalutamide overnight. ARE luciferase activity was determined. (j) 293 cells were transiently transfected with vector, GR or STUB1 for 3 days and treated with 10 nM DEX or DMSO overnight. ARE luciferase activity was determined. \*  $p < 0.05$  Results are the mean of three independent experiments ( $\pm$ S.D.). Statistical analysis was performed using one way ANOVA. ARE: Androgen response element, DEX: Dexamethasone. GR: Glucocorticoid receptor. APO: Apoptozole, VER: Ver155008.

## Supplementary Figure 4

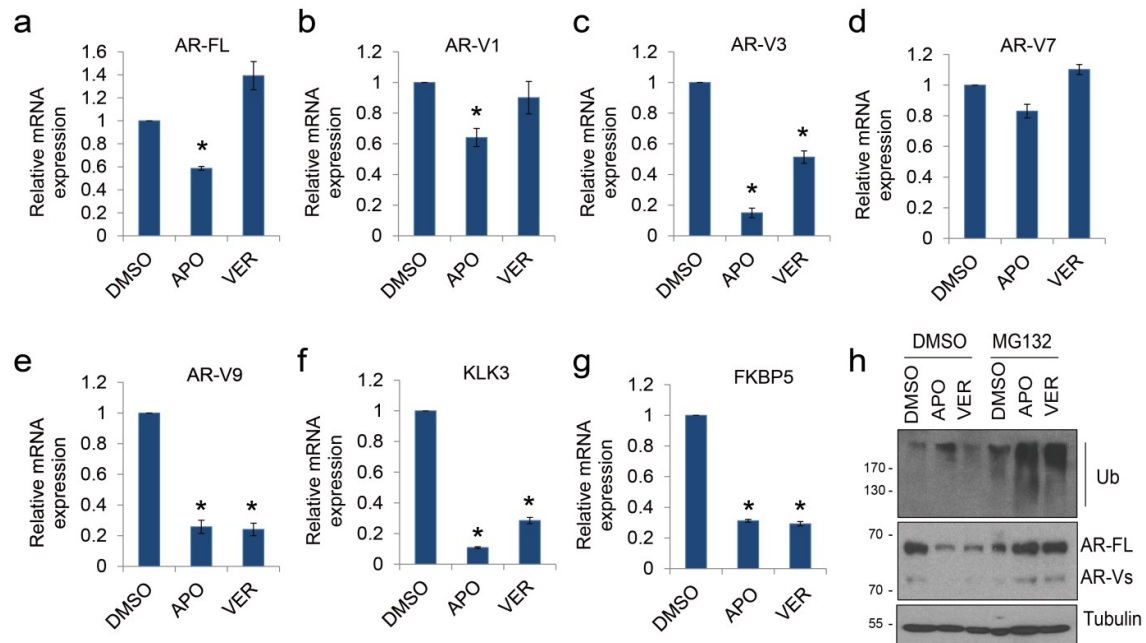

### Supplementary Figure 4. HSP70 inhibitors affect AR/AR variants mRNA expression.

(a-g) C4-2B MDVR cells were treated with 20  $\mu$ M APO or VER for 24 hours, total RNA was extracted from the cells and mRNA levels of AR-FL, AR-V1, AR-V3, AR-V7, AR-V9, KLK3 and FKBP5 was determined by qRT-PCR. (h) C4-2B MDVR cells were treated with 20  $\mu$ M APO or VER for 24 hours, followed by 5  $\mu$ M MG132 for additional 6 hours, whole cell lysates were extracted and subjected to western blot. \*  $p < 0.05$ . Results are the mean of three independent experiments ( $\pm$ S.D.). Statistical analysis was performed using two tailed Student's t test. APO: Apoptozole, VER: Ver155008.



Supplementary Figure 5

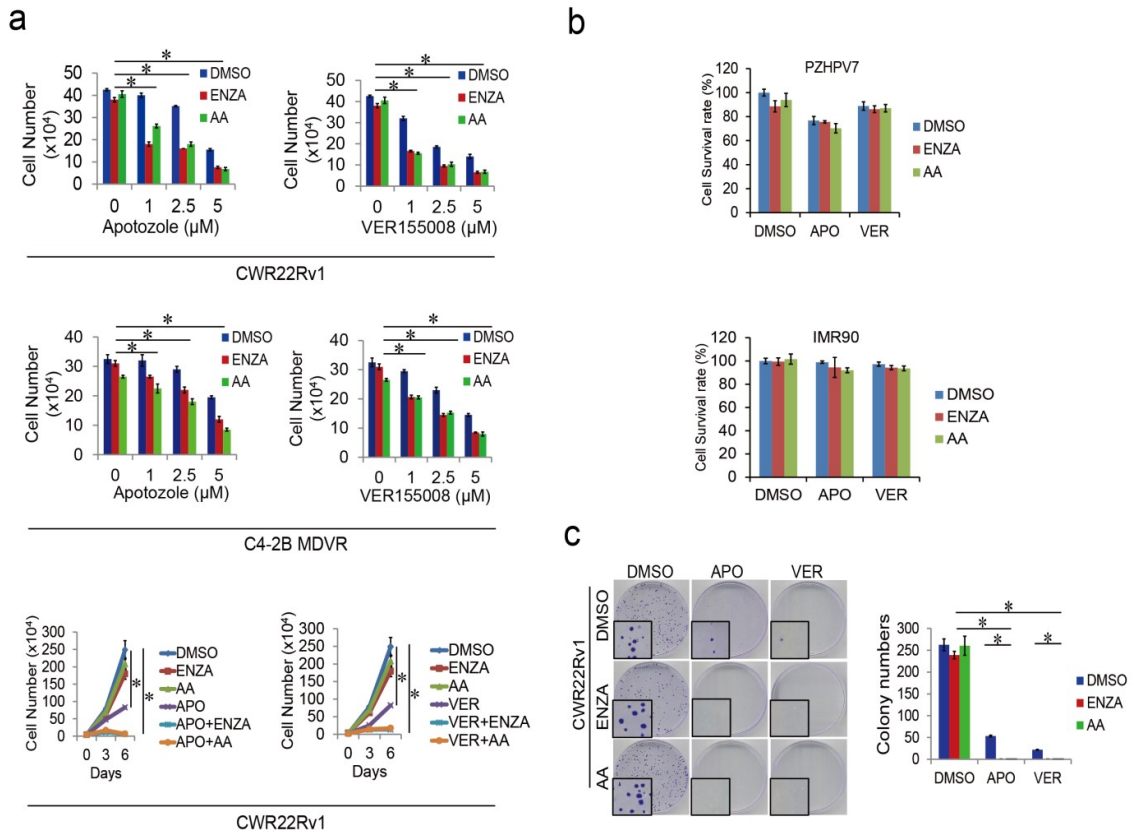

**Supplementary Figure 5. HSP70 inhibitors enhance Enza/AA treatment.** (a) CWR22Rv1 and C4-2B MDVR cells were treated with 1, 2.5 and 5  $\mu\text{M}$  APO or VER with or without 20  $\mu\text{M}$  enzalutamide or 5  $\mu\text{M}$  abiraterone, total cell number was determined at 3 days (top and middle). CWR22Rv1 cells were treated with 5  $\mu\text{M}$  APO or VER with or without enzalutamide and abiraterone, total cell number was determined at 3 and 6 days (bottom). (b) PZ-HPV7 and IMR90 cells were treated with 5  $\mu\text{M}$  APO or VER with or without 20  $\mu\text{M}$  enzalutamide, total cell number was determined at 3 days. (c) CWR22Rv1 cells were treated with 5  $\mu\text{M}$  APO or VER with or without enzalutamide and abiraterone, the colonogenic assay was performed and colonies were quantified. \*  $p < 0.05$ . Results are the mean of three independent experiments ( $\pm$ S.D.). Statistical analysis was performed using one way ANOVA. ENZA: Enzalutamide, AA, Abiraterone acetate, APO: Apotozole, VER: Ver155008.

Supplementary Figure 6

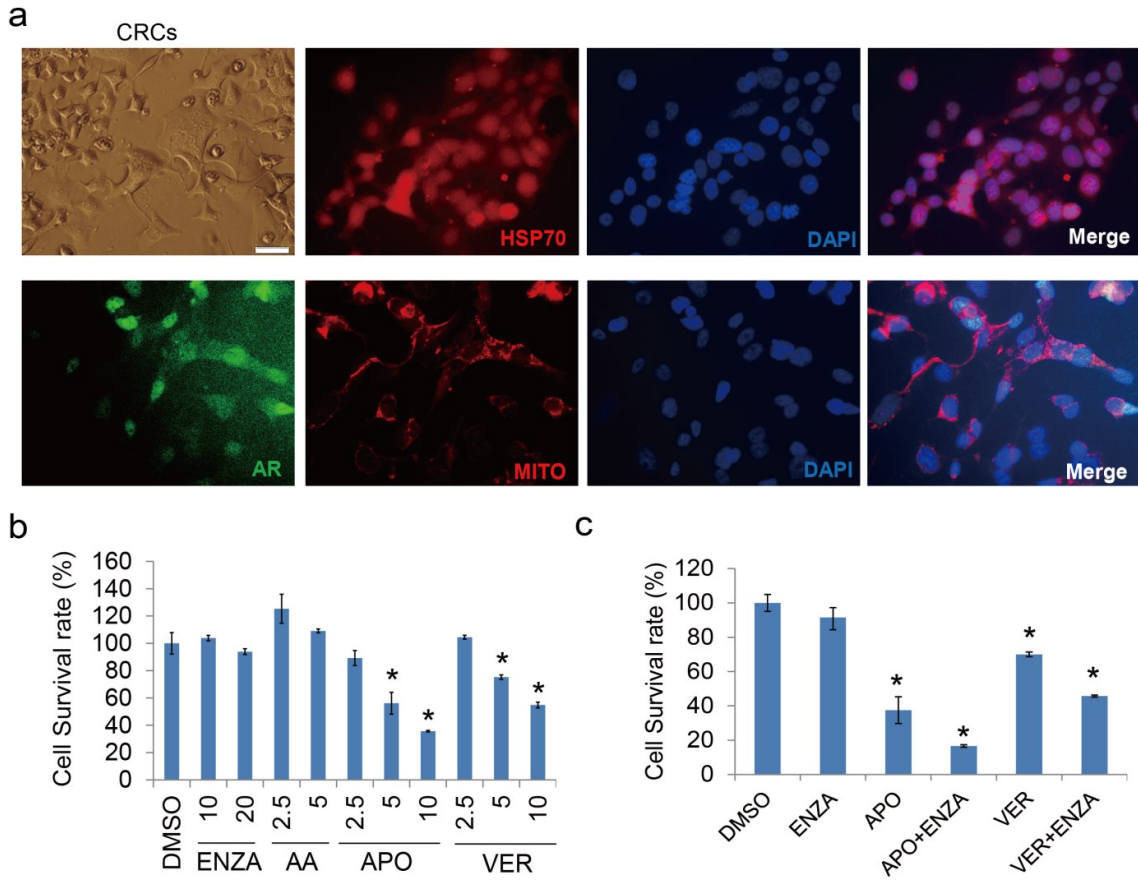

**Supplementary Figure 6. HSP70 inhibitors suppress the growth of patient derived CRCs** (a) Tumor tissues from Gleason 10 prostate cancer patient were processed and CRCs were established. HSP70 (F-3), AR (N20) and human mitochondria (MAB1273) were stained and visualized by fluorescence microscopy. Scale bar 20  $\mu$ m. (b) Patient derived CRCs were treated with different doses of enzalutamide, abiraterone, APO and VER for 5 days, the cell survival rate was determined. (c) Patient derived CRCs were treated with 20 $\mu$ M enzalutamide with or without 10 $\mu$ M APO or VER for 5 days, the cell survival rate was determined. \*  $p < 0.05$ . Results are the mean of three independent experiments ( $\pm$ S.D.). Statistical analysis was performed using two tailed Student's t test. CRCs: Conditionally reprogrammed cells, ENZA: Enzalutamide, AA, Abiraterone acetate, APO: Apoptozole, VER: Ver155008, MITO: Mitochondrial.

Supplementary Figure 7

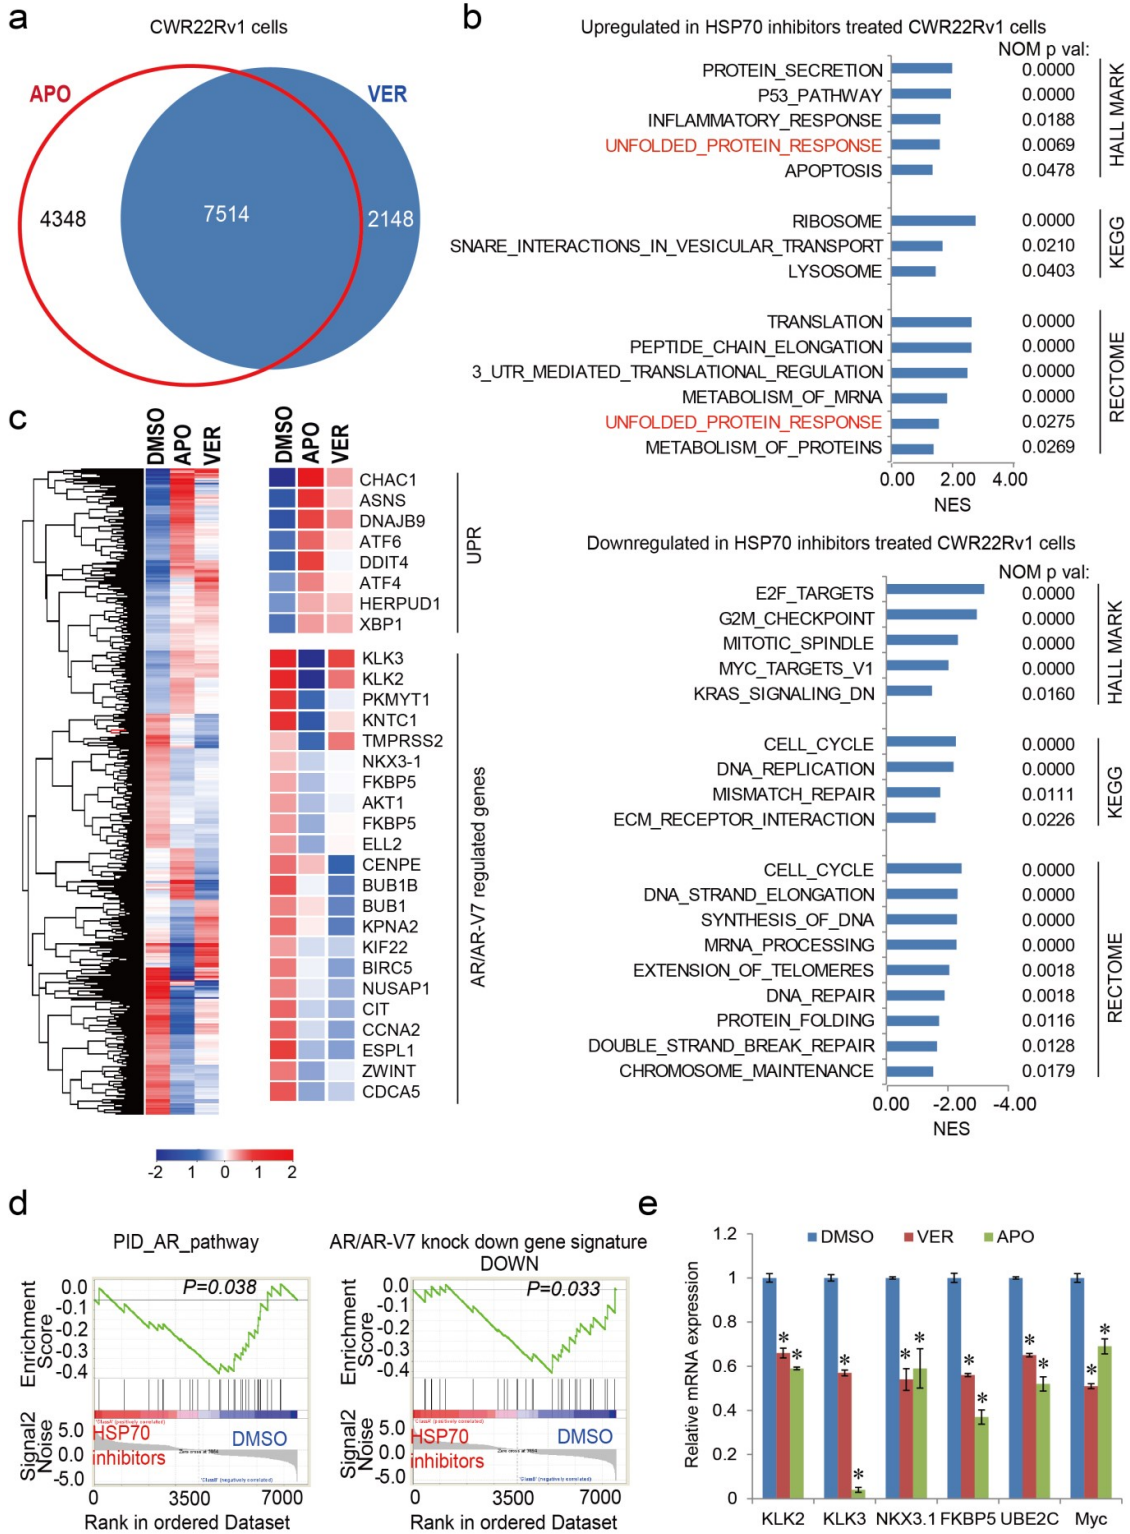

**Supplementary Figure 7. HSP70 inhibitors block AR/AR-V7 pathways in CWR22Rv1 cells.** (a) Venn diagram of RNA-seq analysis of APO vs DMSO and VER vs DMSO in CWR22Rv1 cells. (b) GSEA of top enriched gene sets in CWR22Rv1 cells treated by HSP70 inhibitors. The upregulated and down regulated gene sets from the Hallmark, KEGG and Rectome platforms were output by GSEA. (c) Heatmap and hierarchical clustering of the differentially expressed genes (DEGs) between APO and VER treatment in CWR22Rv1 cells with FC > 1.2, as compared to vehicle (DMSO). The genes were displayed in rows and the normalized counts per sample were displayed in columns. Red indicates up-regulated and blue indicates down-regulated expression levels. Middle and right, UPR, AR and AR-V7 activity-signature genes that were altered in expression are displayed. (d) GSEA of the PID-AR pathway in CWR22Rv1 cells treated with HSP70 inhibitors, as compared to DMSO (left). GSEA of the AR and AR-V7 gene signatures in CWR22Rv1 cells treated with HSP70 inhibitors (right). The signature was defined by genes that underwent significant expression changes as a result of AR and AR-V7 knockdown in prostate cancer cells. (e) qRT-PCR analysis of the indicated genes in CWR22Rv1 cells treated with DMSO or with HSP70 inhibitors (10  $\mu$ M) for 48 hours. \* $p$ <0.05. Results are the mean of three independent experiments ( $\pm$ S.D.). Statistical analysis was performed using two tailed Student's t test. APO: Apoptozole, VER: Ver155008.

Supplementary Figure 8

**a**

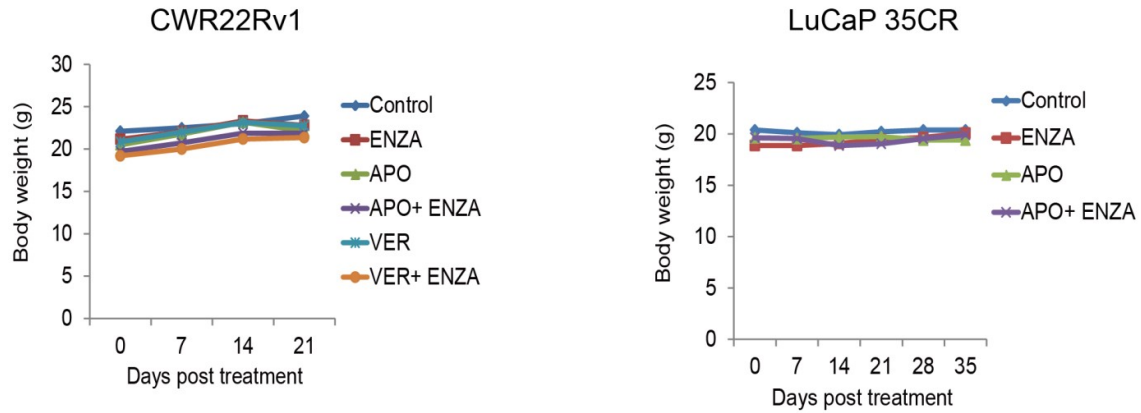

**b**

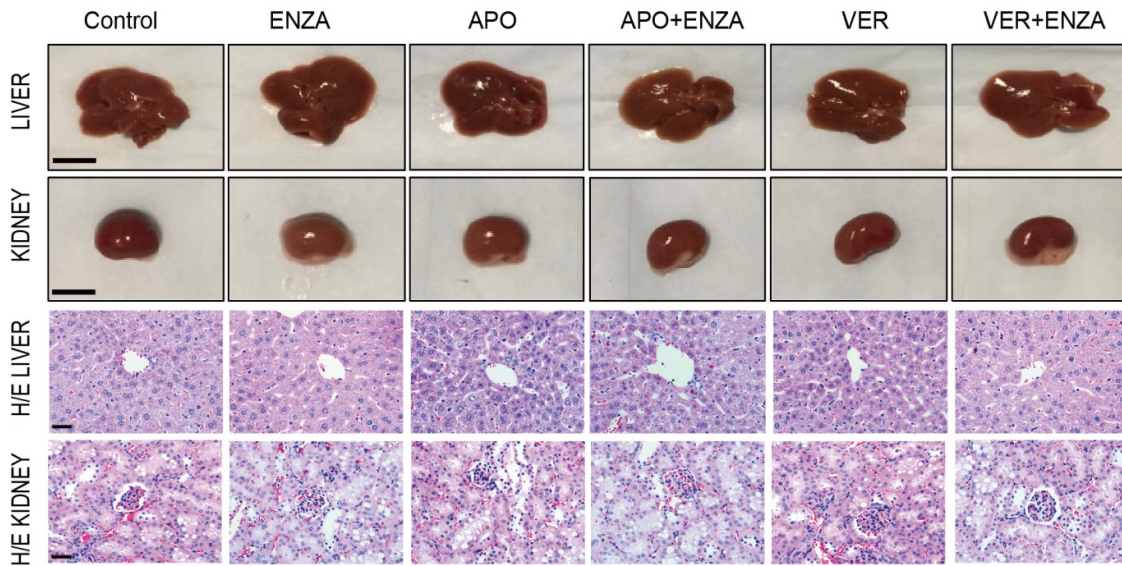

**Supplementary Figure 8. APO and VER have no toxicity in mice.** (a) Mice bearing CWR22Rv1 xenografts were treated with vehicle control, enzalutamide (25 mg per Kg p.o), APO (5 mg per Kg i.p), VER (15 mg per Kg i.p), APO plus enzalutamide and VER plus enzalutamide for 3 weeks. Body weights were determined weekly (left). Mice bearing LuCaP 35CR xenografts were treated with vehicle control, enzalutamide (25 mg per Kg p.o), APO (5 mg per Kg i.p) or their combination for 5 weeks. (b) Liver and kidney were harvested and photographed from CWR22Rv1 xenografts mice. Scale bar 1cm. H&E staining of liver, kidney and tumors from each group was performed. Scale bar 20  $\mu$ m. ENZA: Enzalutamide, APO: Apoptozole, VER: Ver155008.

Supplementary Figure 9

**a**

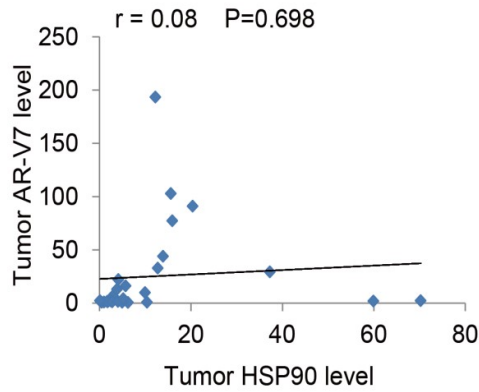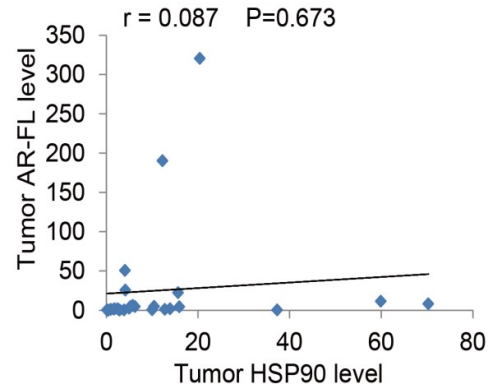

**b**

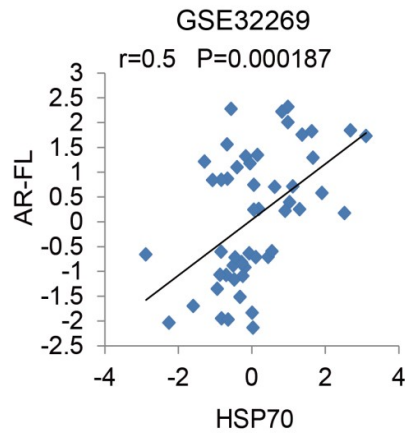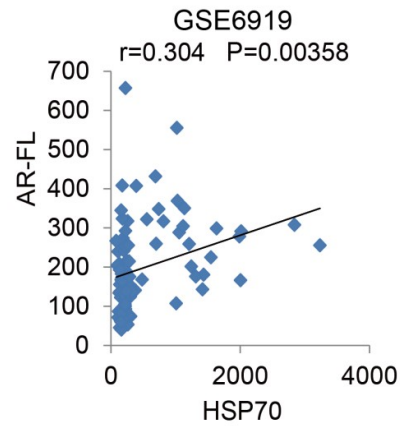

**Supplementary Figure 9. The correlation of AR-FL/HSP90 and AR-V7/HSP90 in high Gleason score prostate tumors.** Total RNA from 26 high Gleason score tumors was isolated and mRNA expression of AR-FL, AR-V7, HSP70 and HSP90 levels was determined. **(a)** AR-FL and HSP90 correlation (left), AR-V7 and HSP90 correlation (right) were determined by spearman rank correlation. **(b)** In two independent GEO data bases (GSE32269, GSE6919), AR and HSP70 gene expression were determined in primary prostate cancer (PCaP) and metastatic prostate cancer (MCaP) tumor samples. The AR-FL and HSP70 correlation was determined by spearman rank correlation.

Supplementary Fig.10

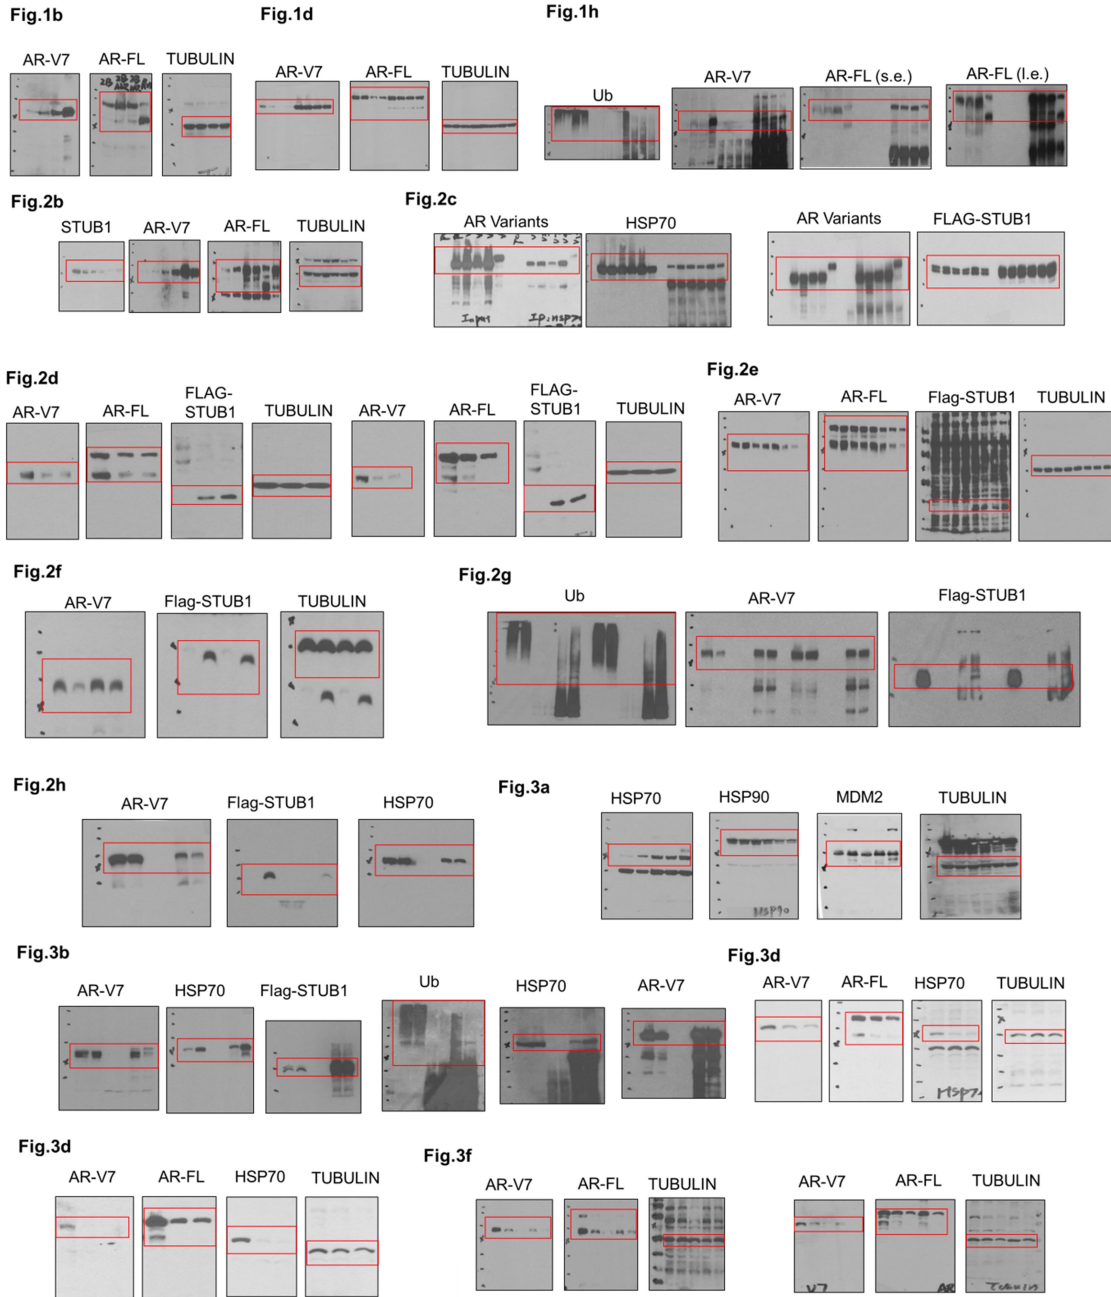

Supplementary Fig.11

Fig.4a

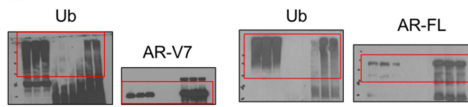

Fig.4b

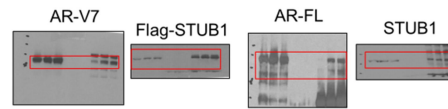

Fig.4d

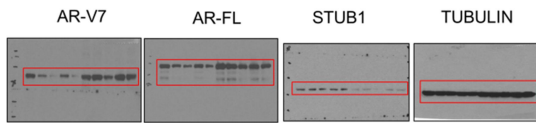

Fig.4f

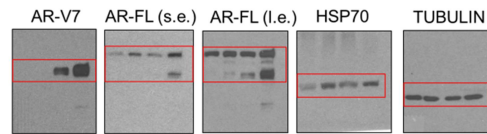

Fig.5a

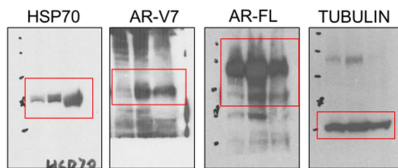

Supplementary Fig.1c

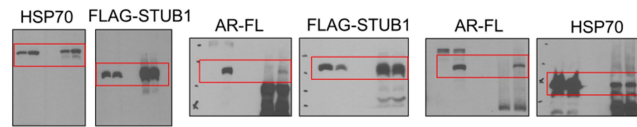

Supplementary Fig.1d

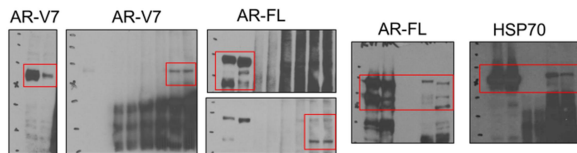

Supplementary Fig.2c

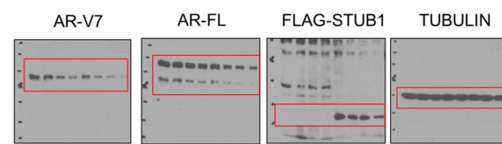

Supplementary Fig.2d

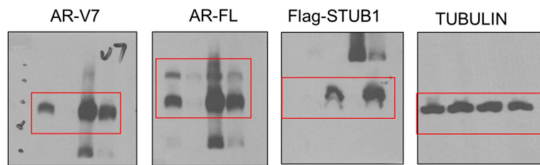

Supplementary Fig.2e

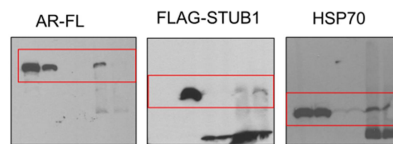

Supplementary Fig.3b

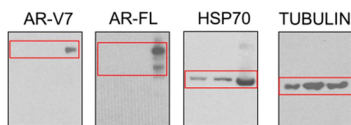

Supplementary Fig.3d

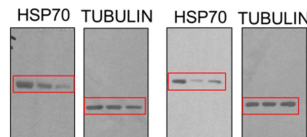

Supplementary Fig.4h

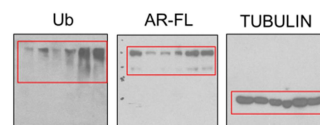



**Supplementary Table 1.** Patient information in the correlation study

| <b>UCD ID</b>  | <b>ID</b> | <b>Biopsy site</b> | <b>Gleason Score</b> | <b>Tissue Type</b> | <b>Drug Treatment</b>                                      |
|----------------|-----------|--------------------|----------------------|--------------------|------------------------------------------------------------|
| <b>PS0085</b>  | 1         | Prostate           | 10                   | HSPC*              | None                                                       |
| <b>PS1168</b>  | 2         | Prostate           | 9                    | CRPC#              | Abiraterone, Enzalutamide                                  |
| <b>PR0860</b>  | 3         | Prostate           | 9                    | HSPC               | None                                                       |
| <b>PS1169</b>  | 4         | Prostate           | 10                   | CRPC               | Lupron, Bicalutamide, Enzalutamide                         |
| <b>PR0911</b>  | 5         | Prostate           | 9                    | HSPC               | None                                                       |
| <b>PR0932</b>  | 6         | Prostate           | 9                    | CRPC               | SBRT Liliun                                                |
| <b>PR0940</b>  | 7         | Prostate           | 9                    | HSPC               | None                                                       |
| <b>PR0967</b>  | 8         | Prostate           | 8                    | HSPC               | None                                                       |
| <b>PR0996</b>  | 9         | Prostate           | 8                    | HSPC               | None                                                       |
| <b>PS1153</b>  | 10        | Prostate           | 8                    | HSPC               | None                                                       |
| <b>PS0867</b>  | 11        | Prostate           | 8                    | CRPC               | Gosreilin, Bicalutamide                                    |
| <b>PS0847</b>  | 12        | Lymph nodes        | 9                    | CRPC               | Bicalutamide                                               |
| <b>PS0869</b>  | 13        | Prostate           | 9                    | CRPC               | Bicalutamide                                               |
| <b>PS0895</b>  | 14        | Prostate           | 8                    | CRPC               | Flutamide                                                  |
| <b>PS1054</b>  | 15        | Lymph nodes        | 9                    | CRPC               | Bicalutamide                                               |
| <b>PS574</b>   | 16        | Prostate           | 8                    | HSPC               | None                                                       |
| <b>PS457</b>   | 17        | Prostate           | 8                    | HSPC               | None                                                       |
| <b>PS608</b>   | 18        | Prostate           | 8                    | HSPC               | None                                                       |
| <b>20316</b>   | 19        | Prostate           | 8                    | CRPC               | Bicalutamide, Abiraterone, Enzalutamide                    |
| <b>PR1014</b>  | 20        | Prostate           | 8                    | HSPC               | None                                                       |
| <b>243-009</b> | 21        | Bone               | 9                    | CRPC               | Leuprolide, Chemo                                          |
| <b>PR1033</b>  | 22        | Prostate           | 9                    | HSPC               | None                                                       |
| <b>PS443-6</b> | 23        | Prostate           | 8                    | CRPC               | Bicalutamide                                               |
| <b>PS848</b>   | 24        | Prostate           | 8                    | HSPC               | None                                                       |
| <b>PS1171</b>  | 25        | Bone               | 9                    | CRPC               | Bicalutamide/Zoladex, Abiraterone, docetaxel, Enzalutamide |
| <b>PS1167</b>  | 26        | Prostate           | 8                    | CRPC               | Gosreilin, Bicalutamide                                    |

#CRPC: Castration resistant prostate cancer. \*HSPC: Hormone sensitive prostate cancer

**Supplementary Table 2.** Up regulated gene sets in HSP70 inhibitors treated C4-2B MDVR cells

| NAME                                                                              | NES  | NOM | p-value |
|-----------------------------------------------------------------------------------|------|-----|---------|
| HALLMARK_UNFOLDED_PROTEIN_RESPONSE                                                | 2.24 |     | 0.0000  |
| HALLMARK_P53_PATHWAY                                                              | 1.98 |     | 0.0000  |
| HALLMARK_PROTEIN_SECRETION                                                        | 1.93 |     | 0.0022  |
| HALLMARK_INFLAMMATORY_RESPONSE                                                    | 1.88 |     | 0.0020  |
| HALLMARK_COAGULATION                                                              | 1.83 |     | 0.0041  |
| HALLMARK_BILE_ACID_METABOLISM                                                     | 1.76 |     | 0.0081  |
| HALLMARK_HEME_METABOLISM                                                          | 1.67 |     | 0.0043  |
| HALLMARK_COMPLEMENT                                                               | 1.56 |     | 0.0103  |
| HALLMARK_XENOBIOTIC_METABOLISM                                                    | 1.46 |     | 0.0402  |
| HALLMARK_HYPOXIA                                                                  | 1.46 |     | 0.0289  |
| KEGG_LYSOSOME                                                                     | 2.31 |     | 0.0000  |
| KEGG_CELL_ADHESION_MOLECULES_CAMS                                                 | 2.08 |     | 0.0000  |
| KEGG_RIBOSOME                                                                     | 2.03 |     | 0.0062  |
| KEGG_SNARE_INTERACTIONS_IN_VESICULAR_TRANSPORT                                    | 1.99 |     | 0.0020  |
| KEGG_NATURAL_KILLER_CELL_MEDIATED_CYTOTOXICITY                                    | 1.90 |     | 0.0062  |
| KEGG_CYTOKINE_CYTOKINE_RECEPTOR_INTERACTION                                       | 1.83 |     | 0.0041  |
| KEGG_OXIDATIVE_PHOSPHORYLATION                                                    | 1.73 |     | 0.0139  |
| KEGG_SPHINGOLIPID_METABOLISM                                                      | 1.70 |     | 0.0144  |
| KEGG_ALANINE_ASPARTATE_AND_Glutamate_METABOLISM                                   | 1.68 |     | 0.0199  |
| KEGG_LEUKOCYTE_TRANSENDOTHELIAL_MIGRATION                                         | 1.64 |     | 0.0257  |
| KEGG_N_GLYCAN_BIOSYNTHESIS                                                        | 1.64 |     | 0.0201  |
| REACTOME_SRP_DEPENDENT_COTRANSLATIONAL_PROTEIN_TARGETING_TO_MEMBRANE              | 2.48 |     | 0.0000  |
| REACTOME_PEPTIDE_CHAIN_ELONGATION                                                 | 2.33 |     | 0.0000  |
| REACTOME_ANTIGEN_PRESENTATION_FOLDING_ASSEMBLY_AND_PEPTIDE_LOADING_OF_CLASS_I_MHC | 2.10 |     | 0.0000  |
| REACTOME_TRANSLATION                                                              | 1.99 |     | 0.0000  |
| REACTOME_ASPARAGINE_N_LINKED_GLYCOSYLATION                                        | 1.90 |     | 0.0041  |
| REACTOME_CYTOSOLIC_TRNA_AMINOACYLATION                                            | 1.86 |     | 0.0040  |
| REACTOME_IMMUNOREGULATORY_INTERACTIONS_BETWEEN_A_LYMPHOID_AND_A_NON_LYMPHOID_CELL | 1.85 |     | 0.0020  |
| REACTOME_UNFOLDED_PROTEIN_RESPONSE                                                | 1.80 |     | 0.0000  |
| REACTOME_SPHINGOLIPID_METABOLISM                                                  | 1.78 |     | 0.0063  |
| REACTOME_INTERFERON_ALPHA_BETA_SIGNALING                                          | 1.77 |     | 0.0063  |
| REACTOME_DIABETES_PATHWAYS                                                        | 1.77 |     | 0.0041  |
| REACTOME_INTERFERON_GAMMA_SIGNALING                                               | 1.76 |     | 0.0122  |
| REACTOME_3_UTR_MEDIATED_TRANSLATIONAL_REGULATION                                  | 1.76 |     | 0.0000  |
| REACTOME_POST_TRANSLATIONAL_PROTEIN_MODIFICATION                                  | 1.73 |     | 0.0040  |
| REACTOME_ACTIVATION_OF_CHAPERONE_GENES_BY_XBP1S                                   | 1.65 |     | 0.0175  |
| REACTOME_PHOSPHOLIPID_METABOLISM                                                  | 1.64 |     | 0.0021  |
| REACTOME_MEMBRANE_TRAFFICKING                                                     | 1.64 |     | 0.0060  |
| REACTOME_SPHINGOLIPID_DE_NOVO_BIOSYNTHESIS                                        | 1.64 |     | 0.0270  |
| REACTOME_NONSENSE_MEDIATED_DECAY_ENHANCED_BY_THE_EXON_JUNCTION_COMPLEX            | 1.63 |     | 0.0020  |
| REACTOME_TRANS_GOLGI_NETWORK_VESICLE_BUDDING                                      | 1.60 |     | 0.0252  |
| REACTOME_AMINO_ACID_TRANSPORT_ACROSS_THE_PLASMA_MEMBRANE                          | 1.60 |     | 0.0323  |
| REACTOME_INFLUENZA_VIRAL_RNA_TRANSCRIPTION_AND_REPLICATION                        | 1.57 |     | 0.0082  |
| REACTOME_RESPIRATORY_ELECTRON_TRANSPORT                                           | 1.54 |     | 0.0432  |
| REACTOME_ANTIGEN_PROCESSING_CROSS_PRESENTATION                                    | 1.53 |     | 0.0434  |

| <b>Supplementary Table 2. Cont'd</b>                                                                       |      |        |
|------------------------------------------------------------------------------------------------------------|------|--------|
| REACTOME_ER_PHAGOSOME_PATHWAY                                                                              | 1.53 | 0.0285 |
| REACTOME_TRANSPORT_OF_GLUCOSE_AND_OTHER_SUGARS_BILE_SALTS_AND_ORGANIC_ACIDS_METAL_IONS_AND_AMINE_COMPOUNDS | 1.51 | 0.0342 |
| REACTOME_METABOLISM_OF_AMINO_ACIDS_AND_DERIVATIVES                                                         | 1.49 | 0.0166 |

**Supplementary Table 3.** Down regulated gene sets in HSP70 inhibitors treated C4-2B MDVR cells

| NAME                                                         | NES   | NOM | p-value |
|--------------------------------------------------------------|-------|-----|---------|
| HALLMARK_E2F_TARGETS                                         | -3.86 |     | 0.0000  |
| HALLMARK_G2M_CHECKPOINT                                      | -3.63 |     | 0.0000  |
| HALLMARK_MYC_TARGETS_V2                                      | -2.96 |     | 0.0000  |
| HALLMARK_MYC_TARGETS_V1                                      | -2.74 |     | 0.0000  |
| HALLMARK_MITOTIC_SPINDLE                                     | -2.38 |     | 0.0000  |
| HALLMARK_ANDROGEN_RESPONSE                                   | -2.27 |     | 0.0000  |
| HALLMARK_DNA_REPAIR                                          | -1.61 |     | 0.0080  |
| HALLMARK_SPERMATOGENESIS                                     | -1.56 |     | 0.0369  |
| KEGG_CELL_CYCLE                                              | -2.99 |     | 0.0000  |
| KEGG_DNA_REPLICATION                                         | -2.90 |     | 0.0000  |
| KEGG_SPLICEOSOME                                             | -2.59 |     | 0.0000  |
| KEGG_SYSTEMIC_LUPUS_ERYTHEMATOSUS                            | -2.23 |     | 0.0000  |
| KEGG_HOMOLOGOUS_RECOMBINATION                                | -2.09 |     | 0.0000  |
| KEGG_MISMATCH_REPAIR                                         | -2.06 |     | 0.0020  |
| KEGG_PYRIMIDINE_METABOLISM                                   | -2.00 |     | 0.0000  |
| KEGG_NUCLEOTIDE_EXCISION_REPAIR                              | -1.96 |     | 0.0000  |
| KEGG_BASE_EXCISION_REPAIR                                    | -1.85 |     | 0.0142  |
| KEGG_RNA_DEGRADATION                                         | -1.83 |     | 0.0059  |
| KEGG_PURINE_METABOLISM                                       | -1.83 |     | 0.0020  |
| KEGG_OOCYTE_MEIOSIS                                          | -1.72 |     | 0.0057  |
| KEGG_PROGESTERONE_MEDIATED_OOCYTE_MATURATION                 | -1.69 |     | 0.0141  |
| KEGG_PANCREATIC_CANCER                                       | -1.63 |     | 0.0222  |
| KEGG_COLORECTAL_CANCER                                       | -1.55 |     | 0.0432  |
| KEGG_SMALL_CELL_LUNG_CANCER                                  | -1.55 |     | 0.0375  |
| KEGG_PATHWAYS_IN_CANCER                                      | -1.46 |     | 0.0134  |
| REACTOME_CELL_CYCLE                                          | -3.73 |     | 0.0000  |
| REACTOME_CELL_CYCLE_MITOTIC                                  | -3.60 |     | 0.0000  |
| REACTOME_DNA_REPLICATION                                     | -3.54 |     | 0.0000  |
| REACTOME_S_PHASE                                             | -3.49 |     | 0.0000  |
| REACTOME_G1_S_TRANSITION                                     | -3.48 |     | 0.0000  |
| REACTOME_MITOTIC_G1_G1_S_PHASES                              | -3.45 |     | 0.0000  |
| REACTOME_MITOTIC_M_M_G1_PHASES                               | -3.36 |     | 0.0000  |
| REACTOME_SYNTHESIS_OF_DNA                                    | -3.31 |     | 0.0000  |
| REACTOME_DNA_STRAND_ELONGATION                               | -3.26 |     | 0.0000  |
| REACTOME_E2F_MEDIATED_REGULATION_OF_DNA_REPLICATION          | -3.18 |     | 0.0000  |
| REACTOME_M_G1_TRANSITION                                     | -3.13 |     | 0.0000  |
| REACTOME_G1_S_SPECIFIC_TRANSCRIPTION                         | -3.09 |     | 0.0000  |
| REACTOME_G2_M_CHECKPOINTS                                    | -3.08 |     | 0.0000  |
| REACTOME_CHROMOSOME_MAINTENANCE                              | -3.08 |     | 0.0000  |
| REACTOME_ACTIVATION_OF_THE_PRE_REPLICATIVE_COMPLEX           | -3.06 |     | 0.0000  |
| REACTOME_PROCESSING_OF_CAPPED_INTRON_CONTAINING_PRE_MRNA     | -3.03 |     | 0.0000  |
| REACTOME_TELOMERE_MAINTENANCE                                | -3.03 |     | 0.0000  |
| REACTOME_MRNA_PROCESSING                                     | -3.02 |     | 0.0000  |
| REACTOME_ACTIVATION_OF_ATR_IN_RESPONSE_TO_REPLICATION_STRESS | -3.00 |     | 0.0000  |
| REACTOME_CELL_CYCLE_CHECKPOINTS                              | -2.89 |     | 0.0000  |
| REACTOME_ASSEMBLY_OF_THE_PRE_REPLICATIVE_COMPLEX             | -2.84 |     | 0.0000  |
| REACTOME_MRNA_SPLICING                                       | -2.80 |     | 0.0000  |
| REACTOME_ORC1_REMOVAL_FROM_CHROMATIN                         | -2.75 |     | 0.0000  |
| REACTOME_EXTENSION_OF_TELOMERES                              | -2.73 |     | 0.0000  |

**Supplementary Table 3. Cont'd**

|                                                                           |       |        |
|---------------------------------------------------------------------------|-------|--------|
| REACTOME_TRANSCRIPTION                                                    | -2.68 | 0.0000 |
| REACTOME_MITOTIC_PROMETAPHASE                                             | -2.67 | 0.0000 |
| REACTOME_G0_AND_EARLY_G1                                                  | -2.63 | 0.0000 |
| REACTOME_DNA_REPAIR                                                       | -2.60 | 0.0000 |
| REACTOME_MEIOSIS                                                          | -2.59 | 0.0000 |
| REACTOME_MEIOTIC_RECOMBINATION                                            | -2.58 | 0.0000 |
| REACTOME_LAGGING_STRAND_SYNTHESIS                                         | -2.57 | 0.0000 |
| REACTOME_DEPOSITION_OF_NEW_CENPA_CONTAINING_NUCLEOSOMES_AT_THE_CENTROMERE | -2.47 | 0.0000 |
| REACTOME_RNA_POL_I_RNA_POL_III_AND_MITOCHONDRIAL_TRANSCRIPTION            | -2.47 | 0.0000 |
| REACTOME_TRANSPORT_OF_MATURE_TRANSCRIPT_TO_CYTOPLASM                      | -2.46 | 0.0000 |
| REACTOME_RNA_POL_I_TRANSCRIPTION                                          | -2.40 | 0.0000 |
| REACTOME_CLEAVAGE_OF_GROWING_TRANSCRIPT_IN_THE_TERMINATION_REGION         | -2.36 | 0.0000 |
| REACTOME_METABOLISM_OF_NON_CODING_RNA                                     | -2.31 | 0.0000 |
| REACTOME_RNA_POL_II_TRANSCRIPTION                                         | -2.30 | 0.0000 |
| REACTOME_CYCLIN_E_ASSOCIATED_EVENTS_DURING_G1_S_TRANSITION                | -2.26 | 0.0000 |
| REACTOME_HIV_LIFE_CYCLE                                                   | -2.24 | 0.0000 |
| REACTOME_PACKAGING_OF_TELOMERE_ENDS                                       | -2.24 | 0.0000 |
| REACTOME_DOUBLE_STRAND_BREAK_REPAIR                                       | -2.24 | 0.0000 |
| REACTOME_NEP_NS2_INTERACTS_WITH_THE_CELLULAR_EXPORT_MACHINERY             | -2.20 | 0.0000 |
| REACTOME_TRANSPORT_OF_RIBONUCLEOPROTEINS_INTO_THE_HOST_NUCLEUS            | -2.19 | 0.0000 |
| REACTOME_MEIOTIC_SYNAPSIS                                                 | -2.19 | 0.0000 |
| REACTOME_RNA_POL_I_PROMOTER_OPENING                                       | -2.18 | 0.0000 |
| REACTOME_MRNA_SPLICING_MINOR_PATHWAY                                      | -2.16 | 0.0000 |
| REACTOME_MITOTIC_G2_G2_M_PHASES                                           | -2.15 | 0.0000 |
| REACTOME_TRANSPORT_OF_MATURE_MRNA_DERIVED_FROM_AN_INTRONLESS_TRANSCRIPT   | -2.14 | 0.0020 |
| REACTOME_REGULATION_OF_GLUKOKINASE_BY_GLUKOKINASE_REGULATORY_PROTEIN      | -2.14 | 0.0000 |
| REACTOME_GLUCOSE_TRANSPORT                                                | -2.13 | 0.0000 |
| REACTOME_MRNA_3_END_PROCESSING                                            | -2.12 | 0.0000 |
| REACTOME_INTERACTIONS_OF_VPR_WITH_HOST_CELLULAR_PROTEINS                  | -2.09 | 0.0000 |
| REACTOME_TRANSCRIPTION_COUPLED_NER_TC_NER                                 | -2.08 | 0.0037 |
| REACTOME_LATE_PHASE_OF_HIV_LIFE_CYCLE                                     | -2.08 | 0.0000 |
| REACTOME_AMYLOIDS                                                         | -2.07 | 0.0019 |
| REACTOME_METABOLISM_OF_NUCLEOTIDES                                        | -2.06 | 0.0000 |
| REACTOME_GLOBAL_GENOMIC_NER_GG_NER                                        | -2.02 | 0.0021 |
| REACTOME_REGULATION_OF_MITOTIC_CELL_CYCLE                                 | -2.00 | 0.0020 |
| REACTOME_ANTIVIRAL_MECHANISM_BY_IFN_STIMULATED_GENES                      | -1.97 | 0.0019 |
| REACTOME_NUCLEOTIDE_EXCISION_REPAIR                                       | -1.96 | 0.0038 |
| REACTOME_FORMATION_OF_TUBULIN_FOLDING_INTERMEDIATES_BY_CCT_TRIC           | -1.92 | 0.0019 |
| REACTOME_DEADENYLATION_DEPENDENT_MRNA_DECAY                               | -1.89 | 0.0078 |
| REACTOME_GLYCOLYSIS                                                       | -1.89 | 0.0097 |
| REACTOME_SCFSPK2_MEDIATED_DEGRADATION_OF_P27_P21                          | -1.89 | 0.0055 |
| REACTOME_PURINE_METABOLISM                                                | -1.86 | 0.0093 |
| REACTOME_RNA_POL_III_TRANSCRIPTION                                        | -1.84 | 0.0059 |

**Supplementary Table 3. Cont'd**

|                                                                                |       |        |
|--------------------------------------------------------------------------------|-------|--------|
| REACTOME_G1_PHASE                                                              | -1.82 | 0.0075 |
| REACTOME_HIV_INFECTION                                                         | -1.80 | 0.0000 |
| REACTOME_METABOLISM_OF_RNA                                                     | -1.77 | 0.0036 |
| REACTOME_CDT1_ASSOCIATION_WITH_THE_CDC6_ORC_ORIGIN_COMPLEX                     | -1.75 | 0.0118 |
| REACTOME_LOSS_OF_NLP_FROM_MITOTIC_CENTROSOMES                                  | -1.72 | 0.0119 |
| REACTOME_PREFOLDIN_MEDIATED_TRANSFER_OF_SUBSTRATE_TO_CCT_TRIC                  | -1.69 | 0.0223 |
| REACTOME_HOST_INTERACTIONS_OF_HIV_FACTORS                                      | -1.66 | 0.0222 |
| REACTOME_RECRUITMENT_OF_MITOTIC_CENTROSOME_PROTEINS_AND_COMPLEXES              | -1.64 | 0.0248 |
| REACTOME_FACTORS_INVOLVED_IN_MEGAKARYOCYTE_DEVELOPMENT_AND_PLATELET_PRODUCTION | -1.62 | 0.0080 |
| REACTOME_SIGNALING_BY_RHO_GTPASES                                              | -1.58 | 0.0261 |
| REACTOME_RNA_POL_I_TRANSCRIPTION_INITIATION                                    | -1.59 | 0.0325 |
| REACTOME_HOST_INTERACTIONS_OF_HIV_FACTORS                                      | -1.57 | 0.0160 |
| REACTOME_MRNA_CAPPING                                                          | -1.55 | 0.0317 |
| REACTOME_CDT1_ASSOCIATION_WITH_THE_CDC6_ORC_ORIGIN_COMPLEX                     | -1.55 | 0.0282 |
| REACTOME_GLUCOSE_METABOLISM                                                    | -1.54 | 0.0254 |
| REACTOME_RNA_POL_II_TRANSCRIPTION_PRE_INITIATION_AND_PROMOTER_OPENING          | -1.51 | 0.0430 |
| REACTOME_RNA_POL_III_TRANSCRIPTION_TERMINATION                                 | -1.50 | 0.0500 |
| REACTOME_PROTEIN_FOLDING                                                       | -1.49 | 0.0460 |
| REACTOME_SIGNALING_BY_RHO_GTPASES                                              | -1.48 | 0.0271 |
| REACTOME_RNA_POL_II_PRE_TRANSCRIPTION_EVENTS                                   | -1.43 | 0.0477 |

**Supplementary Table 4.** Up regulated gene sets in HSP70 inhibitors treated CWR22Rv1 cells

| <b>NAME</b>                                                                                                    | <b>NES</b> | <b>NOM p-value</b> |
|----------------------------------------------------------------------------------------------------------------|------------|--------------------|
| HALLMARK_PROTEIN_SECRETION                                                                                     | 2.00       | 0.0000             |
| HALLMARK_P53_PATHWAY                                                                                           | 1.97       | 0.0000             |
| HALLMARK_HEME_METABOLISM                                                                                       | 1.78       | 0.0000             |
| HALLMARK_INFLAMMATORY_RESPONSE                                                                                 | 1.62       | 0.0188             |
| HALLMARK_UNFOLDED_PROTEIN_RESPONSE                                                                             | 1.60       | 0.0069             |
| HALLMARK_TNFA_SIGNALING_VIA_NFKB                                                                               | 1.45       | 0.0326             |
| HALLMARK_APOPTOSIS                                                                                             | 1.36       | 0.0478             |
| KEGG_RIBOSOME                                                                                                  | 2.77       | 0.0000             |
| KEGG_SNARE_INTERACTIONS_IN_VESICULAR_TRANSPORT                                                                 | 1.69       | 0.0210             |
| KEGG_LYSOSOME                                                                                                  | 1.46       | 0.0403             |
| REACTOME_SRP_DEPENDENT_COTRANSLATIONAL_PROTEIN_TARGETING_TO_MEMBRANE                                           | 2.79       | 0.0000             |
| REACTOME_TRANSLATION                                                                                           | 2.64       | 0.0000             |
| REACTOME_PEPTIDE_CHAIN_ELONGATION                                                                              | 2.64       | 0.0000             |
| REACTOME_3_UTR_MEDIATED_TRANSLATIONAL_REGULATION                                                               | 2.51       | 0.0000             |
| REACTOME_NONSENSE_MEDIATED_DECAY_ENHANCED_BY_THE_EXON_JUNCTION_COMPLEX                                         | 2.42       | 0.0000             |
| REACTOME_INFLUENZA_VIRAL_RNA_TRANSCRIPTION_AND_REPLICATION                                                     | 2.38       | 0.0000             |
| REACTOME_FORMATION_OF_THE_TERNARY_COMPLEX_AND_SUBSEQUENTLY_THE_43S_COMPLEX                                     | 2.06       | 0.0021             |
| REACTOME_ACTIVATION_OF_THE_MRNA_UPON_BINDING_OF_THE_CAP_BINDING_COMPLEX_AND_EIFS_AND_SUBSEQUENT_BINDING_TO_43S | 1.94       | 0.0023             |
| REACTOME_GENERIC_TRANSCRIPTION_PATHWAY                                                                         | 1.90       | 0.0000             |
| REACTOME_METABOLISM_OF_MRNA                                                                                    | 1.84       | 0.0000             |
| REACTOME_INFLUENZA_LIFE_CYCLE                                                                                  | 1.72       | 0.0065             |
| REACTOME_UNFOLDED_PROTEIN_RESPONSE                                                                             | 1.57       | 0.0275             |
| REACTOME_PACKAGING_OF_TELOMERE_ENDS                                                                            | 1.56       | 0.0418             |
| REACTOME_AMINO_ACID_TRANSPORT_ACROSS_THE_PLASMA_MEMBRANE                                                       | 1.55       | 0.0498             |
| REACTOME_DIABETES_PATHWAYS                                                                                     | 1.55       | 0.0179             |
| REACTOME_SIGNALING_BY_ERBB4                                                                                    | 1.52       | 0.0470             |
| REACTOME_METABOLISM_OF_PROTEINS                                                                                | 1.40       | 0.0269             |

**Supplementary Table 5.** Down regulated gene sets in HSP70 inhibitors treated CWR22Rv1 cell

| <b>NAME</b>                                                  | <b>NES</b> | <b>NOM<br/>p-value</b> |
|--------------------------------------------------------------|------------|------------------------|
| HALLMARK_E2F_TARGETS                                         | -3.24      | 0.0000                 |
| HALLMARK_G2M_CHECKPOINT                                      | -2.99      | 0.0000                 |
| HALLMARK_MYC_TARGETS_V2                                      | -2.51      | 0.0000                 |
| HALLMARK_MITOTIC_SPINDLE                                     | -2.37      | 0.0000                 |
| HALLMARK_MYC_TARGETS_V1                                      | -2.05      | 0.0000                 |
| HALLMARK_ESTROGEN_RESPONSE_LATE                              | -1.63      | 0.0053                 |
| HALLMARK_KRAS_SIGNALING_DN                                   | -1.50      | 0.0160                 |
| HALLMARK_SPERMATOGENESIS                                     | -1.50      | 0.0495                 |
| KEGG_CELL_CYCLE                                              | -2.29      | 0.0000                 |
| KEGG_DNA_REPLICATION                                         | -2.22      | 0.0000                 |
| KEGG_PROGESTERONE_MEDIATED_OOCYTE_MATURATION                 | -2.09      | 0.0038                 |
| KEGG_FC_GAMMA_R_MEDIATED_PHAGOCYTOSIS                        | -1.92      | 0.0018                 |
| KEGG_PURINE_METABOLISM                                       | -1.91      | 0.0054                 |
| KEGG_PATHOGENIC_ESCHERICHIA_COLI_INFECTION                   | -1.85      | 0.0056                 |
| KEGG_GAP_JUNCTION                                            | -1.84      | 0.0053                 |
| KEGG_BASE_EXCISION_REPAIR                                    | -1.81      | 0.0056                 |
| KEGG_PYRIMIDINE_METABOLISM                                   | -1.80      | 0.0018                 |
| KEGG_MISMATCH_REPAIR                                         | -1.78      | 0.0111                 |
| KEGG_HOMOLOGOUS_RECOMBINATION                                | -1.78      | 0.0038                 |
| KEGG_GLYCEROLIPID_METABOLISM                                 | -1.73      | 0.0230                 |
| KEGG_OOCYTE_MEIOSIS                                          | -1.70      | 0.0147                 |
| KEGG_ECM_RECEPTOR_INTERACTION                                | -1.63      | 0.0226                 |
| KEGG_SMALL_CELL_LUNG_CANCER                                  | -1.55      | 0.0289                 |
| KEGG_DILATED_CARDIOMYOPATHY                                  | -1.52      | 0.0499                 |
| REACTOME_CELL_CYCLE_MITOTIC                                  | -2.83      | 0.0000                 |
| REACTOME_DNA_REPLICATION                                     | -2.61      | 0.0000                 |
| REACTOME_MITOTIC_M_M_G1_PHASES                               | -2.61      | 0.0000                 |
| REACTOME_MITOTIC_G1_G1_S_PHASES                              | -2.60      | 0.0000                 |
| REACTOME_G1_S_TRANSITION                                     | -2.55      | 0.0000                 |
| REACTOME_ACTIVATION_OF_THE_PRE_REPLICATIVE_COMPLEX           | -2.53      | 0.0000                 |
| REACTOME_S_PHASE                                             | -2.49      | 0.0000                 |
| REACTOME_CELL_CYCLE                                          | -2.49      | 0.0000                 |
| REACTOME_G1_S_SPECIFIC_TRANSCRIPTION                         | -2.43      | 0.0000                 |
| REACTOME_G2_M_CHECKPOINTS                                    | -2.42      | 0.0000                 |
| REACTOME_PROCESSING_OF_CAPPED_INTRON_CONTAINING_PRE_MRNA     | -2.38      | 0.0000                 |
| REACTOME_ACTIVATION_OF_ATR_IN_RESPONSE_TO_REPLICATION_STRESS | -2.36      | 0.0000                 |
| REACTOME_POTASSIUM_CHANNELS                                  | -2.36      | 0.0000                 |
| REACTOME_M_G1_TRANSITION                                     | -2.36      | 0.0000                 |
| REACTOME_DNA_STRAND_ELONGATION                               | -2.35      | 0.0000                 |
| REACTOME_SYNTHESIS_OF_DNA                                    | -2.34      | 0.0000                 |



**Supplementary Table 5. Cont'd**

|                                                                       |       |        |
|-----------------------------------------------------------------------|-------|--------|
| REACTOME_MRNA_PROCESSING                                              | -2.32 | 0.0000 |
| REACTOME_E2F_MEDIATED_REGULATION_OF_DNA_REPLICATION                   | -2.30 | 0.0000 |
| REACTOME_ASSEMBLY_OF_THE_PRE_REPLICATIVE_COMPLEX                      | -2.24 | 0.0000 |
| REACTOME_MITOTIC_G2_G2_M_PHASES                                       | -2.24 | 0.0000 |
| REACTOME_MRNA_SPLICING                                                | -2.16 | 0.0000 |
| REACTOME_MITOTIC_PROMETAPHASE                                         | -2.11 | 0.0000 |
| REACTOME_EXTENSION_OF_TELOMERES                                       | -2.08 | 0.0018 |
| REACTOME_ORC1_REMOVAL_FROM_CHROMATIN                                  | -2.03 | 0.0000 |
| REACTOME_OPIOID_SIGNALLING                                            | -2.01 | 0.0000 |
| REACTOME_LOSS_OF_NLP_FROM_MITOTIC_CENTROSOMES                         | -1.99 | 0.0020 |
| REACTOME_METABOLISM_OF_VITAMINS_AND_COFACTORS                         | -1.99 | 0.0018 |
| REACTOME_CELL_CYCLE_CHECKPOINTS                                       | -1.98 | 0.0000 |
| REACTOME_METABOLISM_OF_NON_CODING_RNA                                 | -1.96 | 0.0000 |
| REACTOME_LAGGING_STRAND_SYNTHESIS                                     | -1.94 | 0.0000 |
| REACTOME_DNA_REPAIR                                                   | -1.92 | 0.0018 |
| REACTOME_GPCR_LIGAND_BINDING                                          | -1.88 | 0.0017 |
| REACTOME_SIGNALING_BY_GPCR                                            | -1.84 | 0.0000 |
| REACTOME_RECRUITMENT_OF_MITOTIC_CENTROSOME_PROTEINS<br>_AND_COMPLEXES | -1.84 | 0.0037 |
| REACTOME_G_ALPHA_Q_SIGNALLING_EVENTS                                  | -1.83 | 0.0038 |
| REACTOME_GLYCOLYSIS                                                   | -1.82 | 0.0019 |
| REACTOME_CLASS_A1_RHODOPSIN_LIKE_RECEPTORS                            | -1.82 | 0.0054 |
| REACTOME_PLC_BETA_MEDIATED_EVENTS                                     | -1.81 | 0.0054 |
| REACTOME_METABOLISM_OF_CARBOHYDRATES                                  | -1.80 | 0.0000 |
| REACTOME_PHOSPHOLIPASE_C_MEDIATED_CASCADE                             | -1.80 | 0.0058 |
| REACTOME_GASTRIN_CREB_SIGNALLING_PATHWAY_VIA_PKC_A<br>ND_MAPK         | -1.78 | 0.0074 |
| REACTOME_PROCESSIVE_SYNTHESIS_ON_THE_LAGGING_STRAND                   | -1.77 | 0.0018 |
| REACTOME_TRANSPORT_OF_MATURE_TRANSCRIPT_TO_CYTOPLA<br>SM              | -1.77 | 0.0133 |
| REACTOME_PROTEIN_FOLDING                                              | -1.74 | 0.0116 |
| REACTOME_PLATELET_ACTIVATION_SIGNALING_AND_AGGREGA<br>TION            | -1.74 | 0.0035 |
| REACTOME_GPCR_DOWNSTREAM_SIGNALING                                    | -1.71 | 0.0019 |
| REACTOME_DOUBLE_STRAND_BREAK_REPAIR                                   | -1.68 | 0.0128 |
| REACTOME_G_ALPHA_I_SIGNALLING_EVENTS                                  | -1.65 | 0.0133 |
| REACTOME_METABOLISM_OF_NUCLEOTIDES                                    | -1.64 | 0.0184 |
| REACTOME_GLUCOSE_METABOLISM                                           | -1.61 | 0.0166 |
| REACTOME_NEURONAL_SYSTEM                                              | -1.61 | 0.0051 |
| REACTOME_CHROMOSOME_MAINTENANCE                                       | -1.55 | 0.0179 |
| REACTOME_HIV_LIFE_CYCLE                                               | -1.55 | 0.0369 |
| REACTOME_PEPTIDE_LIGAND_BINDING_RECEPTORS                             | -1.50 | 0.0418 |
| REACTOME_INTEGRATION_OF_ENERGY_METABOLISM                             | -1.49 | 0.0471 |
| REACTOME_PLATELET_HOMEOSTASIS                                         | -1.49 | 0.0499 |
| REACTOME_TRANSCRIPTION_COUPLED_NER_TC_NER                             | -1.49 | 0.0526 |
| REACTOME_G_ALPHA_Z_SIGNALLING_EVENTS                                  | -1.48 | 0.0693 |
| REACTOME_HEMOSTASIS                                                   | -1.48 | 0.0103 |

**Supplementary Table 6.** Primer list for the qRT-PCR

|                     | Forward                  | Reverse                   |
|---------------------|--------------------------|---------------------------|
| AR-V1               | AACAGAAGTACCTGTGCGCC     | TGAGACTCCAAACACCCTCA      |
| AR-V3               | TGGATGGATAGCTACTCCGG     | G TTCATTCTGAAAAATCCTTCAGC |
| AR-V4               | AACAGAAGTACCTGTGCGCC     | TTCTGTCAGTCCCATTGGTG      |
| AR-V7               | AACAGAAGTACCTGTGCGCC     | TCAGGGTCTGGTCATTTTGA      |
| AR-V9               | TGCGCCAGCAGAAATGATTG     | GCAGCTGCTCAGGTAAGTTG      |
| AR-FL               | AAGCCAGAGCTGTGCAGATGA    | TGTCCTGCAGCCACTGGTTC      |
| HSP70<br>(HSPA1B)   | TGGACTGTTGGGACTCAAGGAC   | GGAACGAAACACCCTTACAGTATCA |
| HSP90<br>(HSP90AA1) | AGCTCAAGCCCTAAGAGACA ACT | AAGATGACCAGATCCTTCACAGA   |
| STUB1               | AGGCCAAGCACGACAAGTACAT   | CTGATCTTGCCACACAGGTAGT    |
| KLK2                | CAACATCTGGAGGGGAAAGGG    | AGGCCAAGTGATGCCAGAAC      |
| KLK3                | GCCCTGCCCCGAAAGG         | GATCCACTCCGGTAATGCA       |
| FKBP5               | GGGAAGATAGTGCCTGGTTAG    | GCAGTCTTGCAGCCTTATTC      |
| NKX3-1              | CCGAGACGCTGGCAGAGACC     | GCTTAGGGGTTTGGGGAAG       |
| UBE2C               | TGGTCTGCCCTGTATGATGT     | AAAAGCTGTGGG GTTTTTCC     |
| Myc                 | TGAGGAGACACCGCCCAC       | CAACATCGATTTCTTCCTCATC    |
| ACTIN               | AGAACTGGCCCTTCTTGGAGG    | GTTTTTATGTTCTCTATGGG      |
